# Supplementary material
Source: MDPI journal article supplement (https://www.mdpi.com/2077-0472/14/4/510)
Supplement: s1 [file s1]

**Table S1.** Training performance of short-term ET<sub>0</sub> forecasting models in each geographic region. Bold characters indicate better results among the models.

| Model's Name                      | Inputs<br>Variables    | Northern     |             |             | Central      |             |             | Southern     |             |             | Eastern      |             |             |
|-----------------------------------|------------------------|--------------|-------------|-------------|--------------|-------------|-------------|--------------|-------------|-------------|--------------|-------------|-------------|
|                                   |                        | <i>r</i>     | MAE         | RMSE        |
| LSTM (T, R <sub>s</sub> )         | T, R <sub>s</sub>      | 0.710        | 1.18        | 1.52        | 0.693        | 0.86        | 1.16        | 0.713        | 0.97        | 1.29        | 0.742        | 0.96        | 1.27        |
| LSTM (T, RH)                      | T, RH                  | 0.648        | 1.29        | 1.64        | 0.569        | 1.02        | 1.32        | 0.423        | 1.34        | 1.66        | 0.616        | 1.17        | 1.49        |
| LSTM (T, R <sub>s</sub> , RH)     | T, R <sub>s</sub> , RH | 0.723        | <b>1.14</b> | <b>1.49</b> | <b>0.712</b> | <b>0.83</b> | <b>1.13</b> | <b>0.728</b> | <b>0.94</b> | <b>1.26</b> | 0.743        | <b>0.95</b> | 1.27        |
| CNN-LSTM (T, R <sub>s</sub> )     | T, R <sub>s</sub>      | 0.619        | 1.35        | 1.69        | 0.600        | 0.98        | 1.29        | 0.627        | 1.09        | 1.43        | 0.653        | 1.12        | 1.43        |
| CNN-LSTM (T, RH)                  | T, RH                  | 0.566        | 1.43        | 1.78        | 0.511        | 1.07        | 1.38        | 0.327        | 1.39        | 1.74        | 0.577        | 1.23        | 1.54        |
| CNN-LSTM (T, R <sub>s</sub> , RH) | T, R <sub>s</sub> , RH | <b>0.724</b> | 1.16        | <b>1.49</b> | 0.711        | 0.84        | <b>1.13</b> | 0.722        | 0.95        | 1.27        | <b>0.745</b> | 0.96        | <b>1.26</b> |
